# Supplementary material for: Electron localization in niobium doped CaMnO3 due to the energy difference of electronic states of Mn and Nb
Source: Royal Society of Chemistry journal article supplement (doi:10.1039/c8cp02783h), 2018-01-01
Supplement: c8cp02783h1.pdf [file c8cp02783h1.pdf]

# Electron localization in niobium doped $\text{CaMnO}_3$ due to the energy difference of electronic states of Mn and Nb

Yi Li, Jian Liu\*, Ji-Chao Li, Yu-Fei Chen, Xin-Miao Zhang, Xue-Jin Wang, Fu-Ning Wang, Wen-Bin Su, Lan-Ling Zhao, Chun-Lei Wang\*

School of Physics, Shandong University, 27 Shanda Nanlu, Jinan 250100, P. R. China

## 1. Bonding features of $\text{CaMn}_{0.75}\text{Nb}_{0.25}\text{O}_3$

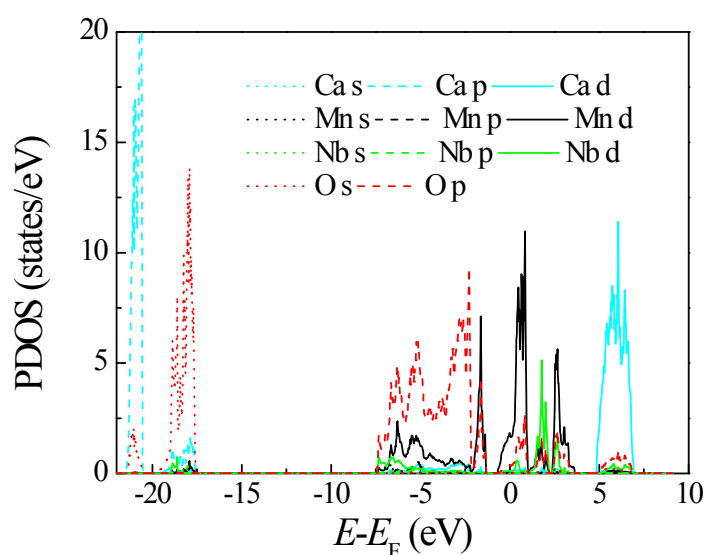

The PDOS of *s*, *p* and *d* orbitals are shown in the above figure. The PDOS of Ca *p* orbital overlap that of O *s* orbital in the energy range from -22 eV to -17 eV, but the peaks of their PDOS are at different energy level. The results indicate an ionic bonding feature of Ca-O. In contrast, the PDOS peaks of Mn and O possess the same energy levels at -6.29 eV and 0.85 eV, indicating a covalent interaction between Mn and O.

---

\* Corresponding authors.

Tel.: +86 531 88377098; fax: +86 531 88377032.

E-mail: liujjx@sdu.edu.cn (Jian Liu), wangcl@sdu.edu.cn (Chunlei Wang).

The two energy levels correspond to the bonding state and the anti-bonding state, respectively. Similarly, Nb also shows a covalent interaction with O.

## 2. POSCAR

CaMn<sub>0.75</sub>Nb<sub>0.25</sub>O<sub>3</sub> unit cell

```

1. 000000000000000
   5. 3686401703722275    0. 0088916389550207    0. 0024110198116741
   0. 0125512224523350    7. 5541585848485440    0. 0035096676821194
   0. 0024621118657015    0. 0025427898206253    5. 3023795401382925

```

0 Ca Mn Nb

12 4 3 1

Direct

```

0. 2892148975641831    0. 0395805084377908    0. 7145935465638322
0. 2153413180043177    0. 9615044362368225    0. 2084528746056885
0. 7042145384275100    0. 5393763311420409    0. 3078300573017292
0. 8057975896710540    0. 4600471710001978    0. 7959872981464493
0. 7107851090355340    0. 9604194775105230    0. 2854064436121601
0. 7846586765489694    0. 0384955563929219    0. 7915471235227745
0. 2957854559596185    0. 4606236766980829    0. 6921699450404490
0. 1942024155435505    0. 5399528439544449    0. 2040127147882862
0. 4841616926424343    0. 2442242045097639    0. 0757622645666347
0. 0180268836346545    0. 7461095798855936    0. 5772402790970826
0. 5158383131061928    0. 7557757860703542    0. 9242377270815265
0. 9819731082269487    0. 2538904248532901    0. 4227597265090473
0. 0392720763173462    0. 2347732187524396    0. 9932958815314675
0. 4519560116144186    0. 7638810277219900    0. 4919375323314075
0. 9607279221899728    0. 7652267811418926    0. 0067041161062270
0. 5480439859187258    0. 2361189691650394    0. 5080624675246037
-0. 0000000014376744    -0. 0000000011312493    0. 5000000000242112
0. 4999999995064274    -0. 0000000032043865    -0. 0000000023404752
0. 0000000011278636    0. 5000000044085777    0. 5000000006940558
0. 5000000063979517    0. 5000000064538719    0. 0000000032928422

```

CaMn<sub>0.75</sub>Nb<sub>0.25</sub>O<sub>3</sub> supercell

```

1. 000000000000000
   10. 7217435071921461    -0. 0000106614406114    -0. 0030569172842581
   0. 0000205864892176    7. 5677883789633507    0. 0000007388873357
   -0. 0031759431945120    -0. 0000278175848779    10. 6214985662229715
0 Ca Mn Nb

```

## Direct

|                     |                    |                    |
|---------------------|--------------------|--------------------|
| 0.1442065890188988  | 0.0308171405357952 | 0.3533471366280221 |
| 0.1018394426395192  | 0.9587017187597601 | 0.1053425933544786 |
| 0.3500230358324558  | 0.5508445077192806 | 0.1473518947469140 |
| 0.3947934678623988  | 0.4619010275358039 | 0.4013353126575153 |
| 0.3500139343853637  | 0.9491607350858570 | 0.1473472388451286 |
| 0.3947890505703951  | 0.0380973963324554 | 0.4013421779366325 |
| 0.1441955246920789  | 0.4691779364963644 | 0.3533452242248272 |
| 0.1018378883888858  | 0.5412991046329069 | 0.1053465180989293 |
| 0.2371780426978510  | 0.2499961361071305 | 0.0364637692076428 |
| -0.0032893991921314 | 0.7500028570036144 | 0.2857390455821516 |
| 0.2544531222288462  | 0.7500043848841627 | 0.4603968121956974 |
| 0.4773779517835923  | 0.2500119069229180 | 0.2025597330482722 |
| 0.6499918274273120  | 0.0508196338859590 | 0.3526812779212377 |
| 0.6052190052992084  | 0.9619257779608366 | 0.0986683155624473 |
| 0.8557845327018979  | 0.5308279572453338 | 0.1466482131984647 |
| 0.8981518451026617  | 0.4587281307437935 | 0.3946705925992437 |
| 0.8557930531015480  | 0.9691633995910884 | 0.1466502593032763 |
| 0.8981556503310080  | 0.0412847297191213 | 0.3946704482221149 |
| 0.6499899472947576  | 0.4491725678958786 | 0.3526765802109148 |
| 0.6052241944395388  | 0.5380690907210721 | 0.0986682284351466 |
| 0.7455588781872710  | 0.2499979698285595 | 0.0396076313046346 |
| 0.5226078993283724  | 0.7499872409658536 | 0.2974389700585636 |
| 0.7628146788453088  | 0.7500013022703912 | 0.4635335005933923 |
| 0.0033007332585720  | 0.2499963065996514 | 0.2142794793873467 |
| 0.1442045150253712  | 0.0308269680580955 | 0.8533453903373490 |
| 0.1018359620171010  | 0.9587102739085472 | 0.6053357597372327 |
| 0.3500186498223191  | 0.5508264938729139 | 0.6473418458691430 |
| 0.3947903278529605  | 0.4618990436820021 | 0.9013301267011605 |
| 0.3500116423339282  | 0.9491723684704017 | 0.6473370153144182 |
| 0.3947915640023724  | 0.0381014027281103 | 0.9013323252234618 |
| 0.1441981180627105  | 0.4691757097826476 | 0.8533419558860259 |
| 0.1018361643835828  | 0.5412955492167673 | 0.6053389260839106 |
| 0.2371698739645814  | 0.2499956106307647 | 0.5364569341214016 |
| -0.0032894999682005 | 0.7500023903329719 | 0.7857365904143311 |
| 0.2544545471049776  | 0.7500048844904399 | 0.9603933768536769 |
| 0.4773843740573095  | 0.2500049165544657 | 0.7025453927479104 |
| 0.6499881291455223  | 0.0508189749585779 | 0.8526659672863798 |
| 0.6052264156255982  | 0.9619276163719206 | 0.5986570073040743 |
| 0.8557885753073595  | 0.5308282338059160 | 0.6466358907611380 |
| 0.8981484866359410  | 0.4587245695991924 | 0.8946707569892610 |
| 0.8557870847365426  | 0.9691665356594579 | 0.6466358931763134 |
| 0.8981549017261565  | 0.0412882856124003 | 0.8946605834064453 |

|                      |                      |                      |
|----------------------|----------------------|----------------------|
| 0. 6499860100456996  | 0. 4491765343994805  | 0. 8526650571215368  |
| 0. 6052288773905030  | 0. 5380776500062839  | 0. 5986541301672954  |
| 0. 7455691229147643  | 0. 2500006391462132  | 0. 5396042779364418  |
| 0. 5226036132566318  | 0. 7499948540375536  | 0. 7974247906186334  |
| 0. 7628083183862108  | 0. 7499982778390749  | 0. 9635298378352838  |
| 0. 0032964172386172  | 0. 2499959717061338  | 0. 7142736219446880  |
| 0. 0191352840621023  | 0. 2500014583443261  | 0. 4977480323989302  |
| 0. 2131760226856752  | 0. 7500001778640387  | 0. 2465234173342556  |
| 0. 4694746371211349  | 0. 7500030335430693  | 0. 0058235171959164  |
| 0. 2481351816346779  | 0. 2500013221108541  | 0. 2513085411669614  |
| 0. 5305344321146801  | 0. 2500013566806593  | 0. 4941683480612493  |
| 0. 7518510764949800  | 0. 7499993563442711  | 0. 2486948991688367  |
| 0. 9808590554850148  | 0. 7500017083551833  | 0. 0022620074415553  |
| 0. 7868344205668478  | 0. 2499982265170434  | 0. 2534826603397703  |
| 0. 0191366166267055  | 0. 2500009075319956  | 0. 9977469787847969  |
| 0. 2131778144085877  | 0. 7499974660666128  | 0. 7465193127226896  |
| 0. 4694703834602305  | 0. 7500025755430343  | 0. 5058251467781024  |
| 0. 2481328530041898  | 0. 2499994665725361  | 0. 7512914247379563  |
| 0. 5305257352024416  | 0. 2500002273662332  | 0. 9941757452966937  |
| 0. 7518536359639288  | 0. 7499984419887326  | 0. 7486926718758184  |
| 0. 9808665222593469  | 0. 7499995641769315  | 0. 5022572819696560  |
| 0. 7868337716075465  | 0. 2499929701432749  | 0. 7534770578376625  |
| 0. 0000022969437112  | -0. 0000125214008866 | 0. 2500050281790142  |
| 0. 2419921031133287  | -0. 0015141468442466 | 0. 0010802319560805  |
| -0. 0000018468070831 | 0. 5000118678108330  | 0. 2500038074939901  |
| 0. 2419899906636765  | 0. 5015146628498385  | 0. 0010801372916614  |
| 0. 2419860193661482  | 0. 5015134624066152  | 0. 5010775243353949  |
| 0. 7580090882565120  | 0. 0015159007017174  | -0. 0010805470567459 |
| 0. 7580052406021552  | 0. 4984843112904907  | -0. 0010807265134673 |
| -0. 0000007000730985 | -0. 0000078027165031 | 0. 7499975399213438  |
| 0. 2419866859912216  | -0. 0015153214238405 | 0. 5010789271673780  |
| -0. 0000026388162375 | 0. 5000068620426168  | 0. 7499994583892484  |
| 0. 7580133585339291  | 0. 4984859265660612  | 0. 4989158857486731  |
| 0. 7580126658866542  | 0. 0015149911115946  | 0. 4989149512135715  |
| 0. 5000014584675067  | 0. 4999857171516988  | 0. 2499994148499899  |
| 0. 4999972642613797  | 0. 0000149911713059  | 0. 2500012150970193  |
| 0. 5000052476231598  | 0. 4999983508156217  | 0. 7499922135454967  |
| 0. 5000032359947708  | 0. 0000017750043668  | 0. 7499934881099944  |

CaMn<sub>0.875</sub>Nb<sub>0.125</sub>O<sub>3</sub> supercell

1. 00000000000000

|                      |                      |                      |
|----------------------|----------------------|----------------------|
| 10. 6578682268375413 | -0. 0000218131546484 | 0. 0000918007435452  |
| -0. 0000137562515881 | 7. 5017646819162609  | 0. 0000117537022184  |
| -0. 0000078380810517 | 0. 0000139806023962  | 10. 5323031717361459 |

O Ca Mn Nb  
48 16 14 2

Direct

|                    |                    |                    |
|--------------------|--------------------|--------------------|
| 0.1439721650551564 | 0.0395889748432828 | 0.3535334412890344 |
| 0.1034864565571564 | 0.9586143937704088 | 0.1050594296343285 |
| 0.3537090554805735 | 0.5331359054076928 | 0.1474637690737746 |
| 0.3958500768249568 | 0.4700906402500452 | 0.3974930567195394 |
| 0.3537102043622931 | 0.9668663216182631 | 0.1474650410628086 |
| 0.3958477764976758 | 0.0299043954318348 | 0.3974981678805095 |
| 0.1439716033250938 | 0.4604086909744931 | 0.3535323741437193 |
| 0.1034928906748969 | 0.5413885273155975 | 0.1050572337647653 |
| 0.2351738391629373 | 0.2500097972904372 | 0.0396981082792364 |
| 0.0064228828907146 | 0.7499990355602543 | 0.2870330750241266 |
| 0.2510722535066374 | 0.7499979723082720 | 0.4581778383924999 |
| 0.4920747163191289 | 0.2500024942930975 | 0.2231311161284404 |
| 0.6462913957470999 | 0.0331329617414191 | 0.3525364636353801 |
| 0.6041499007235851 | 0.9700958449082672 | 0.1025033765739256 |
| 0.8560293584636053 | 0.5395929918184071 | 0.1464716493318430 |
| 0.8965069275789095 | 0.4586129344805546 | 0.3949425675927321 |
| 0.8560294430900566 | 0.9604093618496224 | 0.1464720778444009 |
| 0.8965111594851001 | 0.0413846127409520 | 0.3949422723803792 |
| 0.6462894499115107 | 0.4668652545189102 | 0.3525365777425243 |
| 0.6041479117998714 | 0.5299094906948418 | 0.1025091889403908 |
| 0.7489276375738171 | 0.2500056844043447 | 0.0418273398227142 |
| 0.5079261794645094 | 0.7499972320626075 | 0.2768696759436671 |
| 0.7648266135033850 | 0.7499967145387544 | 0.4603044822391180 |
| 0.9935759056910238 | 0.2500005847854377 | 0.2129678046926484 |
| 0.1442540433296045 | 0.0299525514747058 | 0.8556092099204876 |
| 0.1047565663939145 | 0.9616828965056661 | 0.6051267269082015 |
| 0.3517352521921777 | 0.5518555827795606 | 0.6430682114525711 |
| 0.3900556957446049 | 0.4525640795302284 | 0.8978594119335382 |
| 0.3517359619239154 | 0.9481469898565590 | 0.6430628038441847 |
| 0.3900571233949408 | 0.0474322117622991 | 0.8978559066819934 |
| 0.1442548208816001 | 0.4700531912998583 | 0.8556063803552927 |
| 0.1047500102406281 | 0.5383184501860734 | 0.6051255647344259 |
| 0.2449339205654737 | 0.2500010942574821 | 0.5342380263677415 |
| 0.9970060201903257 | 0.7499945063733775 | 0.7850743568097769 |
| 0.2605454121174726 | 0.7499930074342632 | 0.9659229368893968 |
| 0.4832207056237110 | 0.2500013877188659 | 0.6948903978379350 |
| 0.6482644802637477 | 0.0518589147641366 | 0.8569323250056821 |
| 0.6099431329214839 | 0.9525669990071780 | 0.6021423017048463 |
| 0.8557459063791333 | 0.5299455731826398 | 0.6443932695806117 |
| 0.8952516167289354 | 0.4616814669237887 | 0.8948721066472625 |
| 0.8557442218155489 | 0.9700480946302149 | 0.6443898466262876 |

|                      |                      |                     |
|----------------------|----------------------|---------------------|
| 0. 8952459417093500  | 0. 0383169401859550  | 0. 8948703431074614 |
| 0. 6482613567140718  | 0. 4481429303743771  | 0. 8569303670664788 |
| 0. 6099441682445089  | 0. 5474334804656303  | 0. 6021411160008624 |
| 0. 7394546264457967  | 0. 2500000269322565  | 0. 5340750573875090 |
| 0. 5167789244836055  | 0. 7499993620486602  | 0. 8051069268140284 |
| 0. 7550655316701406  | 0. 7499949852588942  | 0. 9657581206560497 |
| 0. 0029934087231930  | 0. 2500054354160933  | 0. 7149250805081089 |
| 0. 0227331518579584  | 0. 2500036096736708  | 0. 4952249276006487 |
| 0. 2255763119461051  | 0. 7499966667447837  | 0. 2423336460602955 |
| 0. 4752930241984356  | 0. 7499975263962348  | 0. 0223748289099292 |
| 0. 2706338864283699  | 0. 2500027735013218  | 0. 2560842292439767 |
| 0. 5247085537035056  | 0. 2499983584187908  | 0. 4776256805223107 |
| 0. 7293681514440556  | 0. 7499982606468043  | 0. 2439217378018726 |
| 0. 9772714335154116  | 0. 7499969574500098  | 0. 0047738575675800 |
| 0. 7744259497490142  | 0. 2500027275934555  | 0. 2576708310495460 |
| 0. 0175678173304605  | 0. 2499989409728817  | 0. 9977135240508971 |
| 0. 2168709909469285  | 0. 7499980899072920  | 0. 7495317902218538 |
| 0. 4762236491340082  | 0. 7499988781183802  | 0. 4897051107460016 |
| 0. 2499299356105996  | 0. 2500038689833713  | 0. 7508170982999199 |
| 0. 5237703266528405  | 0. 2500027213150798  | 0. 0102970090642271 |
| 0. 7500704139401275  | 0. 7499981532678622  | 0. 7491776651317881 |
| 0. 9824310731493674  | 0. 7500036368656072  | 0. 5022859542110948 |
| 0. 7831292400863038  | 0. 2500008639487978  | 0. 7504632276574692 |
| -0. 0000001117873048 | 0. 9999973748284637  | 0. 2499991367230548 |
| 0. 2461305327893708  | 0. 0017836103170287  | 0. 0043835154954067 |
| -0. 0000005757697244 | 0. 4999994445219641  | 0. 2500004375386143 |
| 0. 2461293389915799  | 0. 4982150484140562  | 0. 0043825954402723 |
| 0. 7538708489670871  | 0. 5017853984964269  | 0. 4956174626027575 |
| 0. 7536771782098802  | 0. 0031165497851356  | 0. 0031313750651033 |
| 0. 7536779788705034  | 0. 4968851483601037  | 0. 0031302406697350 |
| 0. 0000012983949829  | 0. 0000012793989278  | 0. 7499985812077644 |
| 0. 2463236379539905  | 0. 9968838598281957  | 0. 4968693731277465 |
| -0. 0000000878610825 | 0. 5000004481890001  | 0. 7500000605398305 |
| 0. 4999997804721356  | -0. 0000014676297639 | 0. 2500015576222271 |
| 0. 7538709863268322  | 0. 9982165039329113  | 0. 4956149061343739 |
| 0. 5000009277735007  | 0. 4999991651841598  | 0. 2500005041682016 |
| 0. 2463220385613464  | 0. 5031155839664920  | 0. 4968700448699530 |
| 0. 4999976307124326  | 0. 5000000643193069  | 0. 7499998587859869 |
| 0. 5000000353133839  | -0. 0000010216933296 | 0. 7499963088963202 |
